# Supplementary material for: Study The Mechanism of Huangdi Anxiao Capsules In The Treatment of T2DM of Using UPLC-Q-TOF-MSE Combined With Network Pharmacological
Source: Research Square preprint supplement (doi:10.21203/rs.3.rs-1199441/v1), 2022-01-03
Supplement: Supplementary file 1 [file f18849d261fe63fc00290fd9.xlsx]

## Sheet: Sheet1
Group	β-actin	AKT1	Relative expression of AKT1	EGFR1	Relative expression of EGFR	SRC	Relative expression of SRC	VEGFA	Relative expression of VEGFA
Control-1	80469	36573	0.454498	33375	0.414756	29778	0.370056	35663	0.443189
Model-1	82536	66156	0.801541	51720	0.626636	51311	0.62168	60602	0.734249
HDAXC-1	81281	49008	0.602945	41187	0.506724	37235	0.458102	50786	0.62482
Control-2	78746	37587	0.477319	34510	0.438244	27120	0.344398	35174	0.446677
Modol-2	77006	65576	0.85157	51433	0.667909	47924	0.622341	68273	0.886593
HDAXC-2	77863	47438	0.60925	41559	0.533745	38666	0.49659	51106	0.656358
Control-3	83255	35512	0.426545	36075	0.433307	30632	0.36793	41442	0.497772
Model-3	85888	66526	0.774567	65826	0.766417	48117	0.56023	73925	0.860714
HDAXC-3	82776	50884	0.614719	43703	0.527967	40393	0.48798	61206	0.739417
Group	Average relative expression of AKT1	Average relative expression of EGFR	Average relative expression of SRC	Average relative expression of VEGFA
Control	0.452787	0.428769	0.360795	0.462546
Model	0.809226	0.686987	0.601417	0.827186
HDAXC	0.608971	0.522812	0.480891	0.673532
Group	Standard deviation	Standard deviation	Standard deviation	Standard deviation
Control	0.0254304	0.0123844	0.0142392	0.0305564
Model	0.0390725	0.0718169	0.0356709	0.0815186
HDAXC	0.00589188	0.0142293	0.0201996	0.0591974
